# Supplementary material for: Randomized phase II study of nab‐paclitaxel as first‐line chemotherapy in patients with HER2‐negative metastatic breast cancer
Source: PubMed Central journal article supplement — Cancer Sci. 2017 May 5;108(5):987–94. doi: 10.1111/cas.13221 (PMC5448660; doi:10.1111/cas.13221), 2017-05-05
Supplement: CAS-108-987-s001.pdf [file CAS-108-987-s001.pdf]

Table S1. Dose reduction schema for *nab*-paclitaxel and docetaxel

|                        | Initial dose          | Level 1               | Level 2               | Level 3              |
|------------------------|-----------------------|-----------------------|-----------------------|----------------------|
| <i>Nab</i> -Paclitaxel | 150 mg/m <sup>2</sup> | 125 mg/m <sup>2</sup> | 100 mg/m <sup>2</sup> | 80 mg/m <sup>2</sup> |
| Docetaxel              | 75 mg/m <sup>2</sup>  | 60 mg/m <sup>2</sup>  | 50 mg/m <sup>2</sup>  | Not applicable       |

Table S2. Dose reduction criteria for *nab*-paclitaxel and docetaxel

| Toxicity                 | Event                                                                           | <i>Nab</i> -Paclitaxel | Docetaxel   |
|--------------------------|---------------------------------------------------------------------------------|------------------------|-------------|
| Neutropenia              | ≥ Grade 4 for consecutive ≥ 7 days                                              | 1 level                | 1 level     |
| Thrombocytopenia         | ≥ Grade 3                                                                       | 1 level                | 1 level     |
| Non-hematologic toxicity | ≥ Grade 3                                                                       | 1 level                | 1 level     |
| Other                    | Dose reduction criteria during the step 3                                       | Discontinue            | -           |
| Other                    | Dose reduction criteria during the step 2                                       | -                      | Discontinue |
| Other                    | Cases in which the investigator has determined that dose reduction is necessary | 1 level                | 1 level     |

Table S3. Dose interruption criteria within treatment cycle

| Toxicity                 | <i>Nab-paclitaxel and docetaxel</i>                                                |
|--------------------------|------------------------------------------------------------------------------------|
| Neutropenia              | ≥ Grade 4 for consecutive ≥ 7 days                                                 |
| Thrombocytopenia         | ≥ Grade 3                                                                          |
| Non-hematologic toxicity | ≥ Grade 3                                                                          |
| Other                    | Cases in which the investigator has determined that dose interruption is necessary |

Table S4. Criteria to start next cycle for *nab*-paclitaxel and docetaxel

|                                                        | Criteria               |
|--------------------------------------------------------|------------------------|
| Hemoglobin                                             | $\geq 8.0$ g/dL        |
| Neutrophil count                                       | $\geq 1500$ / $\mu$ L  |
| Platelet count                                         | $\geq 75000$ / $\mu$ L |
| Total bilirubin                                        | $\leq 1.5$ mg/dL       |
| Aspartate aminotransferase or alanine aminotransferase | $\leq 100$ IU/L        |
| Serum creatinine                                       | $\leq 1.5$ mg/dL       |
| Non-hematological toxicity                             | $\leq$ Grade2          |
